# Supplementary material for: Characteristics of Organic Phosphorus Pool in Soil of Typical Agriculture Systems in South China
Source: MDPI journal article supplement (doi:10.3390/horticulturae8111055), 2022-11-09
Supplement: s1 [file s1]

Table S1 Classification of soil nutrient concentrations

| Rank | Organic matter<br>(OM) (g kg <sup>-1</sup> ) | Available nitrogen<br>(AN) (mg kg <sup>-1</sup> ) | Available potassium<br>(AK) (mg kg <sup>-1</sup> ) | Total phosphorus<br>(TP) (g kg <sup>-1</sup> ) | Available phosphorus<br>(AP) (mg kg <sup>-1</sup> ) | Description       |
|------|----------------------------------------------|---------------------------------------------------|----------------------------------------------------|------------------------------------------------|-----------------------------------------------------|-------------------|
| 1    | >40                                          | >150                                              | >200                                               | 2.00                                           | >40                                                 | very rich         |
| 2    | 30-40                                        | 120-150                                           | 150-200                                            | 1.50-2.00                                      | 20-39                                               | rich              |
| 3    | 20-30                                        | 90-120                                            | 100-150                                            | 1.00-1.50                                      | 10-19                                               | medium high level |
| 4    | 10-20                                        | 60-90                                             | 50-100                                             | 0.70-1.00                                      | 5-9                                                 | medium low level  |
| 5    | 6-10                                         | 30-60                                             | 30-50                                              | 0.40-0.70                                      | 3-4                                                 | deficient         |
| 6    | <6                                           | <30                                               | <30                                                | <0.40                                          | <3                                                  | very deficient    |
